# Supplementary material for: Alternative splicing and thermosensitive expression of Dmrt1 during urogenital development in the painted turtle, Chrysemys picta
Source: PubMed Central journal article supplement (PMC7085901; doi:10.7717/peerj.8639), 2020-03-19

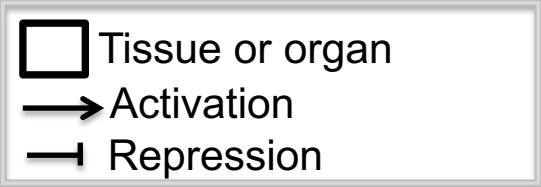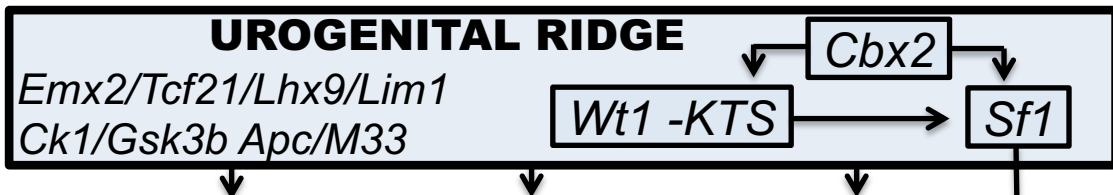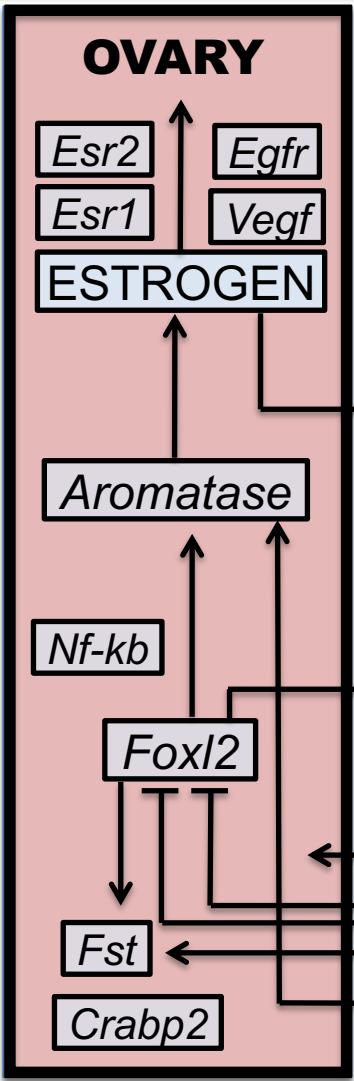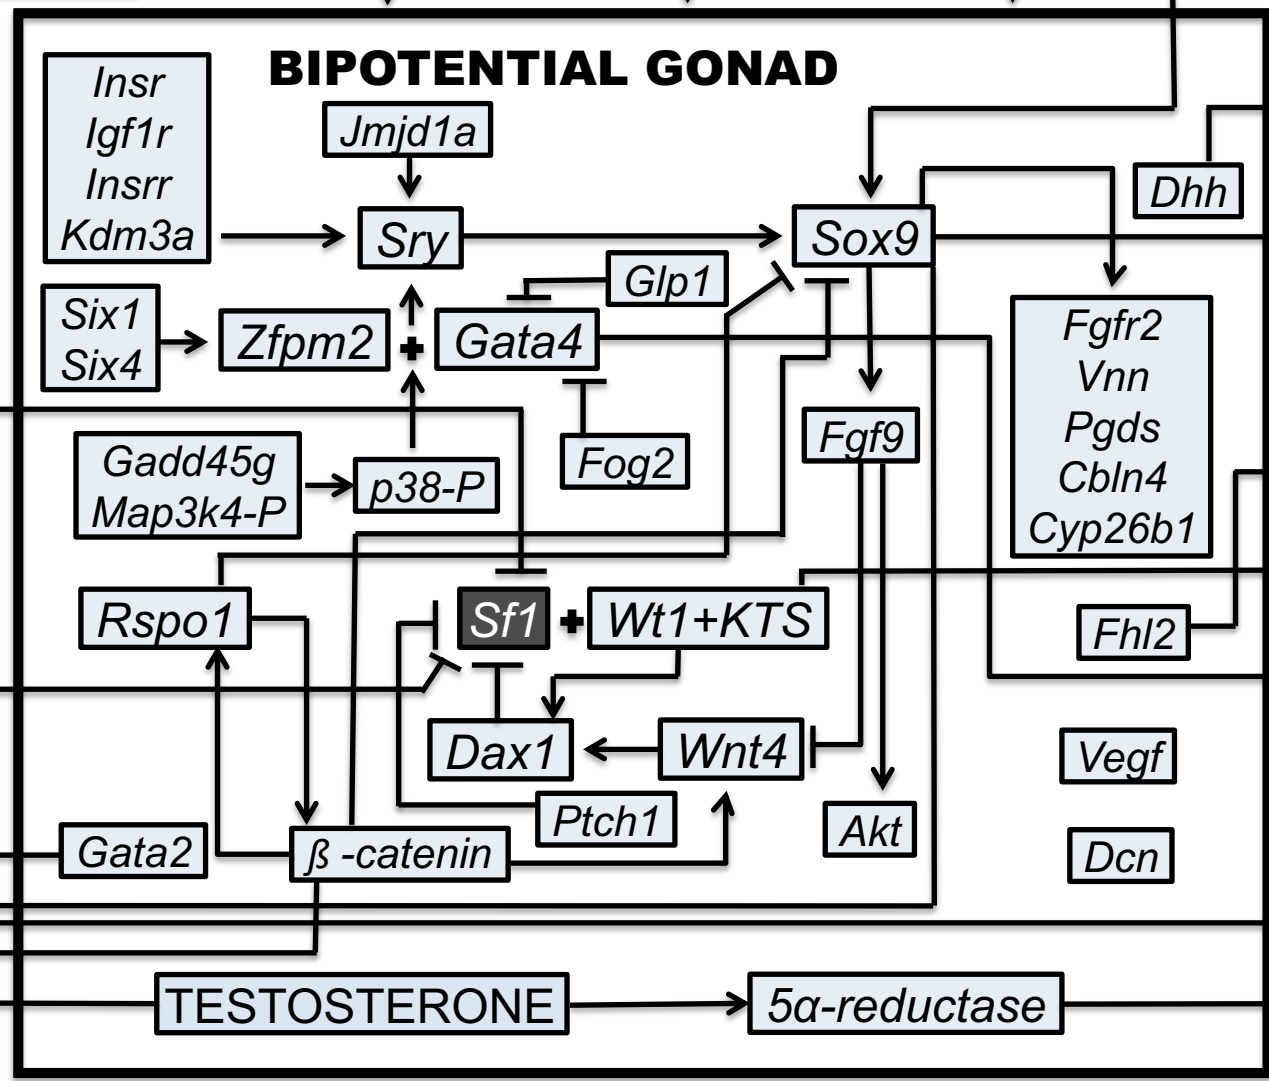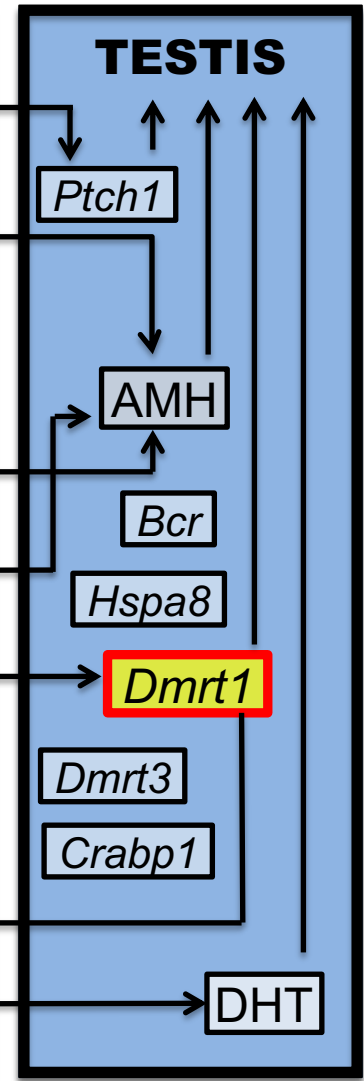

Supplement: peerj-08-8639-s001.pdf [file peerj-08-8639-s001.pdf]
