# Supplementary material for: Alternative splicing and thermosensitive expression of Dmrt1 during urogenital development in the painted turtle, Chrysemys picta
Source: PubMed Central journal article supplement (PMC7085901; doi:10.7717/peerj.8639), 2020-03-19
Supplement: peerj-08-8639-s004.pdf [file peerj-08-8639-s004.pdf]

Tables of read counts obtained from Kallisto. Reads are separated by developmental stage and incubation temperature (26°C = Male Producing Temperature, 31°C = Female Producing Temperature).

Table 1 – Read counts for the reference gene,  $\beta$ -actin

| ACTB     | 26°C        | 31°C        |
|----------|-------------|-------------|
| Stage 9  | 119.7537885 | 148.2066378 |
| Stage 12 | 85.31827286 | 87.27149015 |
| Stage 15 | 81.92285147 | 112.9892575 |
| Stage 19 | 91.26996659 | 124.45333   |
| Stage 22 | 76.58841836 | 74.78698857 |

Table 2 – Read counts for the *Dmrt1* canonical transcript

| <i>Dmrt1</i> canonical | 26°C        | 31°C        |
|------------------------|-------------|-------------|
| Stage 9                | 2.422649092 | 2.161248462 |
| Stage 12               | 0           | 1.045890836 |
| Stage 15               | 2.418880734 | 0           |
| Stage 19               | 49.85323249 | 0           |
| Stage 22               | 123.5170211 | 6.575945712 |

Table 3 – Read counts for the *Dmrt1*  $\Delta$ Ex2Ex3 transcript

| <i>Dmrt1</i> $\Delta$ Ex2Ex3 | 26°C        | 31°C        |
|------------------------------|-------------|-------------|
| Stage 9                      | 4.670833627 | 2.130633487 |
| Stage 12                     | 1.449632071 | 0.480599649 |
| Stage 15                     | 0.987823425 | 0           |
| Stage 19                     | 59.06395916 | 23.71100978 |
| Stage 22                     | 92.4728508  | 11.86918086 |
